# Supplementary material
Source: Research Square preprint supplement (doi:10.21203/rs.3.rs-8438584/v1)
Supplement: Supplementary file 1 [file 71ce7e5bfb9823a04c124b61.docx]

**Mesenchymal Stem Cells Promote Healing of Radiation-Induced Skin Injury by Enhancing Mitochondrial Function**

Guangyan Hea,b,1, Yang Xub,1, Wengfeng Lib, Xiaorui Shic, Xueli Pana*, Chunmeng Shia,b*

aSchool of Public Health, the Key Laboratory of Environmental Pollution Monitoring and Disease Control, Ministry of Education, Guizhou Medical University, Guiyang 561113, China

bInstitute of Rocket Force Medicine, State Key Laboratory of Trauma and Chemical Poisoning, Third Military Medical University (Army Medical University), Gaotanyan Road Street, Shapingba district, Chongqing 400038, China

cDepartment of Plastic Surgery, State Key Laboratory of Trauma and Chemical Poisoning, Southwest Hospital, Third Military Medical University (Army Medical University), Gaotanyan Road Street, Shapingba district, Chongqing 400038, China

1These authors contributed equally to the study.

***Corresponding author**: Email: xuelipan@gmc.edu.cn, shicm@tmmu.edu.cn.


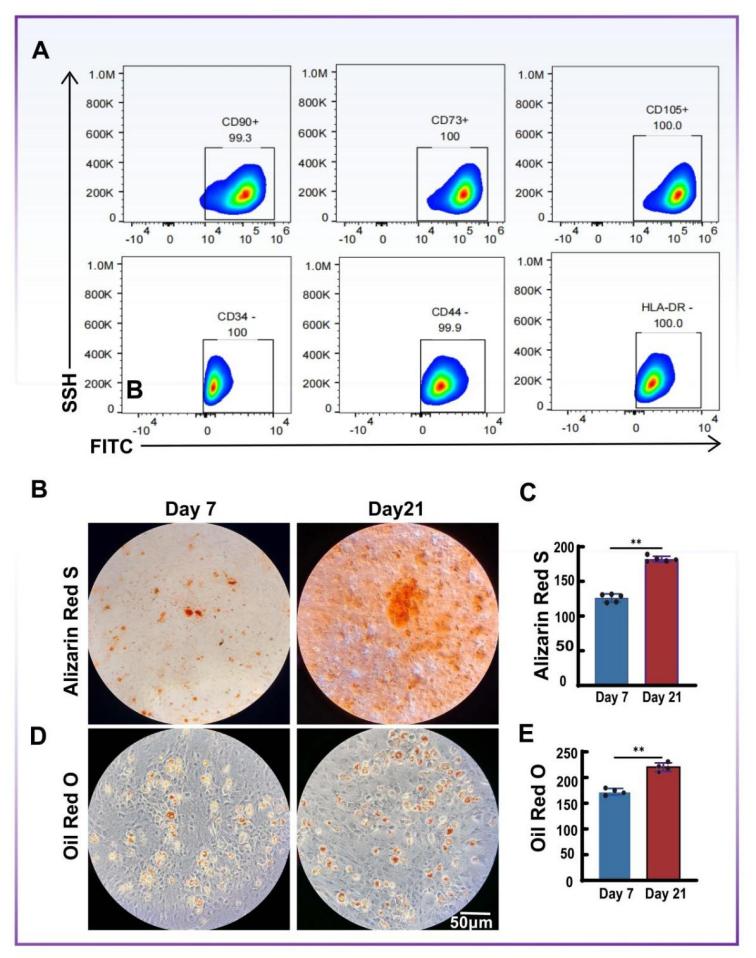


**Fig. S1.** **Identification and characterization of HUCMSCs.** (**A**) Flow cytometric characterization of surface markers: positive markers CD90, CD73, CD105; negative markers CD34, CD44, HLA-DR. Characterization of HUCMSCs. (**B**) Representative Oil Red O staining showing lipid droplet formation at Day 7 and Day 21 following adipogenic induction. (**C**) Semi-quantitative analysis of Oil Red O staining. (**D**) Representative Alizarin Red staining showing mineralized nodules at Day 7 and Day 21 following osteogenic induction. (**E**) Semi-quantitative analysis of Alizarin Red staining. n=3 (***p* < 0.01).
